# Supplementary material for: Aerosolized Insecticide Spray Distributions and Relationships to Efficacy against Stored Product Pests
Source: MDPI journal article supplement (doi:10.3390/insects14120914), 2023-11-28
Supplement: s1 [file s1]

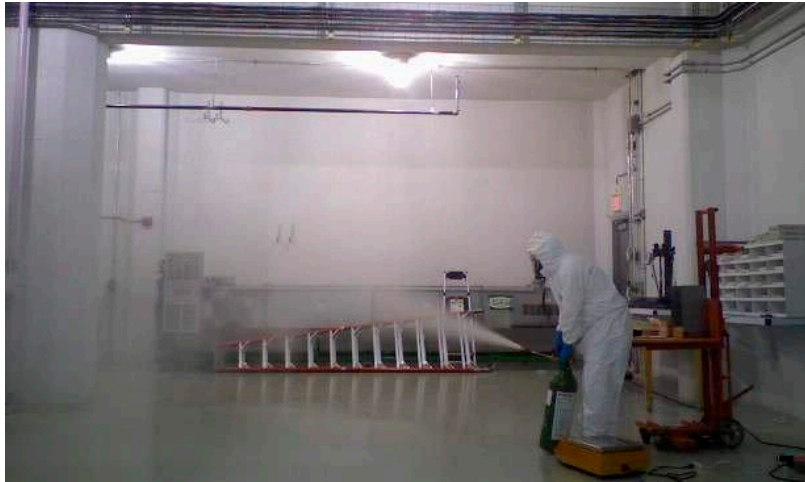

Figure S1. Photo of Turbocide fog being dispensed by commercial applicator at KSU experimental mill.

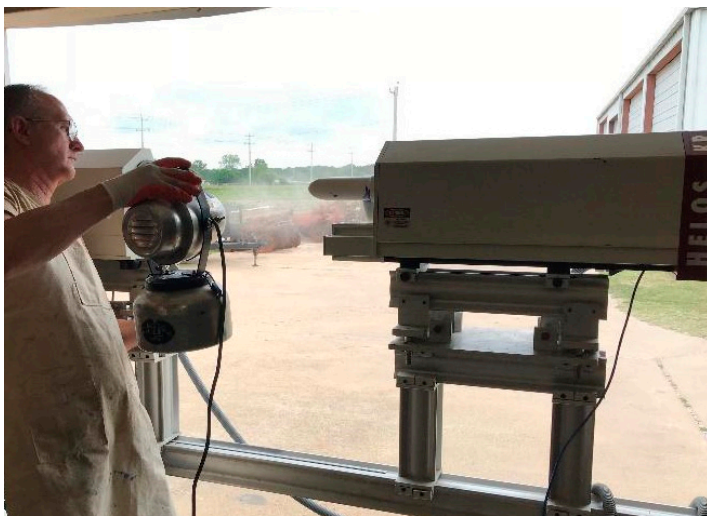

Figure S2. Photos of 2018 spray trials with Microjet-7401 at USDA-ARS facility in College Station, TX.

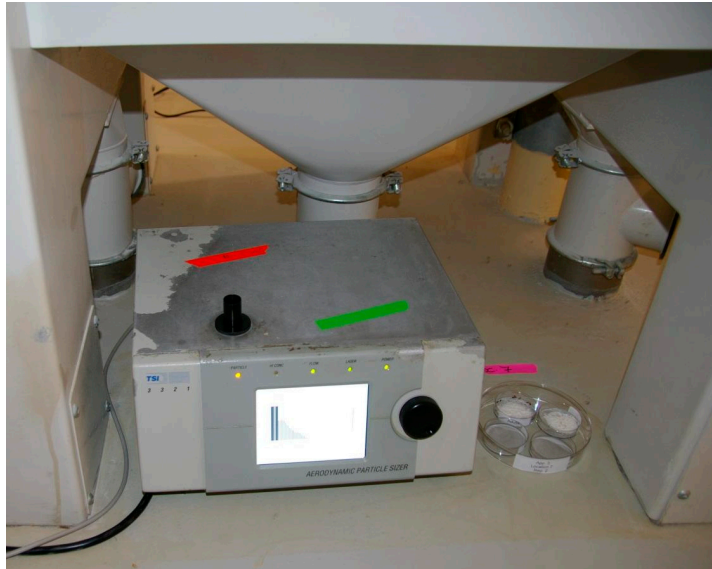

Figure S3. Example of APS unit deployed at KSU experimental mill for measuring spray mass concentrations during 60 minute holding period.

Table S1. Abbreviated table of APS mass concentration data for 52 drop size bins. Note that columns between drop 1.11um and 14.9um are hidden. Note that rows from time 5.0 to time 55.0 are hidden.

|                     |                                                                               |            |            |              |        |       |       |       |       |       |       |       |       |       |       |       |  |       |       |       |       |       |
|---------------------|-------------------------------------------------------------------------------|------------|------------|--------------|--------|-------|-------|-------|-------|-------|-------|-------|-------|-------|-------|-------|--|-------|-------|-------|-------|-------|
| Sample File         | C:\Users\Daniel.Brabe\Desktop\APS2016 Aug04 Thur\ksumil2016-11\Trial01-11_A21 |            |            |              |        |       |       |       |       |       |       |       |       |       |       |       |  |       |       |       |       |       |
| Sample Time         | 20                                                                            |            |            |              |        |       |       |       |       |       |       |       |       |       |       |       |  |       |       |       |       |       |
| Density             | 0.82                                                                          |            |            |              |        |       |       |       |       |       |       |       |       |       |       |       |  |       |       |       |       |       |
| Stokes Correction   | off                                                                           |            |            |              |        |       |       |       |       |       |       |       |       |       |       |       |  |       |       |       |       |       |
| Lower Channel Bound | 0.5                                                                           |            |            |              |        |       |       |       |       |       |       |       |       |       |       |       |  |       |       |       |       |       |
| Upper Channel Bound | 20.5                                                                          |            |            |              |        |       |       |       |       |       |       |       |       |       |       |       |  |       |       |       |       |       |
|                     |                                                                               |            |            |              | 1      | 2     | 3     | 4     | 5     | 6     | 7     | 8     | 9     | 10    | 11    | 12    |  | 48    | 49    | 50    | 51    | 52    |
| Sample #            | Date                                                                          | Start Time | Time (min) | dynamic Dize | <0.523 | 0.54  | 0.58  | 0.63  | 0.67  | 0.72  | 0.78  | 0.84  | 0.90  | 0.97  | 1.04  | 1.11  |  | 14.9  | 16.0  | 17.2  | 18.4  | 19.8  |
| 41                  | 8/2/2016                                                                      | 10:05:22   | 0.0        | dM           | 0.000  | 0.000 | 0.000 | 0.000 | 0.000 | 0.000 | 0.000 | 0.000 | 0.000 | 0.000 | 0.000 | 0.000 |  | 0.000 | 0.000 | 0.000 | 0.000 | 0.000 |
| 42                  | 8/2/2016                                                                      | 10:05:42   | 0.3        | dM           | 0.000  | 0.000 | 0.000 | 0.000 | 0.000 | 0.000 | 0.000 | 0.000 | 0.000 | 0.000 | 0.000 | 0.000 |  | 0.000 | 0.000 | 0.000 | 0.000 | 0.000 |
| 43                  | 8/2/2016                                                                      | 10:06:02   | 0.7        | dM           | 0.000  | 0.000 | 0.000 | 0.000 | 0.000 | 0.000 | 0.000 | 0.000 | 0.000 | 0.000 | 0.000 | 0.000 |  | 0.000 | 0.000 | 0.000 | 0.000 | 0.000 |
| 44                  | 8/2/2016                                                                      | 10:06:22   | 1.0        | dM           | 0.005  | 0.002 | 0.003 | 0.003 | 0.004 | 0.004 | 0.005 | 0.006 | 0.007 | 0.008 | 0.008 | 0.008 |  | 0.370 | 0.318 | 0.630 | 1.326 | 2.670 |
| 45                  | 8/2/2016                                                                      | 10:06:42   | 1.3        | dM           | 0.002  | 0.001 | 0.001 | 0.001 | 0.001 | 0.001 | 0.002 | 0.002 | 0.002 | 0.002 | 0.003 | 0.003 |  | 0.080 | 0.099 | 0.149 | 0.076 | 0.297 |
| 46                  | 8/2/2016                                                                      | 10:07:02   | 1.7        | dM           | 0.009  | 0.004 | 0.004 | 0.005 | 0.006 | 0.008 | 0.010 | 0.011 | 0.013 | 0.014 | 0.015 | 0.016 |  | 0.466 | 0.699 | 0.622 | 0.630 | 0.903 |
| 47                  | 8/2/2016                                                                      | 10:07:22   | 2.0        | dM           | 0.015  | 0.006 | 0.007 | 0.009 | 0.011 | 0.014 | 0.016 | 0.019 | 0.022 | 0.024 | 0.026 | 0.027 |  | 1.120 | 1.193 | 0.998 | 1.043 | 1.605 |
| 48                  | 8/2/2016                                                                      | 10:07:42   | 2.3        | dM           | 0.005  | 0.002 | 0.002 | 0.003 | 0.003 | 0.004 | 0.005 | 0.005 | 0.006 | 0.007 | 0.007 | 0.008 |  | 0.552 | 0.727 | 0.788 | 0.359 | 0.499 |
| 49                  | 8/2/2016                                                                      | 10:08:02   | 2.7        | dM           | 0.004  | 0.001 | 0.002 | 0.002 | 0.002 | 0.003 | 0.004 | 0.004 | 0.005 | 0.006 | 0.006 | 0.007 |  | 0.188 | 0.226 | 0.140 | 0.098 | 0.067 |
| 50                  | 8/2/2016                                                                      | 10:08:22   | 3.0        | dM           | 0.004  | 0.001 | 0.002 | 0.002 | 0.002 | 0.003 | 0.004 | 0.005 | 0.005 | 0.006 | 0.006 | 0.007 |  | 0.114 | 0.141 | 0.149 | 0.054 | 0.040 |
| 51                  | 8/2/2016                                                                      | 10:08:42   | 3.3        | dM           | 0.003  | 0.001 | 0.001 | 0.001 | 0.002 | 0.002 | 0.003 | 0.003 | 0.004 | 0.004 | 0.005 | 0.005 |  | 0.074 | 0.120 | 0.035 | 0.011 | 0.027 |
| 52                  | 8/2/2016                                                                      | 10:09:02   | 3.7        | dM           | 0.006  | 0.002 | 0.002 | 0.003 | 0.004 | 0.005 | 0.006 | 0.007 | 0.008 | 0.009 | 0.009 | 0.010 |  | 0.136 | 0.078 | 0.044 | 0.033 | 0.013 |
| 53                  | 8/2/2016                                                                      | 10:09:22   | 4.0        | dM           | 0.009  | 0.003 | 0.003 | 0.004 | 0.005 | 0.006 | 0.008 | 0.010 | 0.011 | 0.012 | 0.012 | 0.013 |  | 0.455 | 0.692 | 0.447 | 0.380 | 0.823 |
| 54                  | 8/2/2016                                                                      | 10:09:42   | 4.3        | dM           | 0.015  | 0.004 | 0.005 | 0.006 | 0.008 | 0.010 | 0.013 | 0.016 | 0.018 | 0.019 | 0.020 | 0.022 |  | 0.938 | 1.051 | 0.753 | 1.174 | 2.050 |
| 55                  | 8/2/2016                                                                      | 10:10:02   | 4.7        | dM           | 0.031  | 0.010 | 0.011 | 0.014 | 0.017 | 0.022 | 0.027 | 0.032 | 0.037 | 0.041 | 0.045 | 0.049 |  | 1.575 | 1.383 | 1.856 | 3.618 | 3.412 |
| 56                  | 8/2/2016                                                                      | 10:10:22   | 5.0        | dM           | 0.032  | 0.010 | 0.011 | 0.014 | 0.017 | 0.022 | 0.027 | 0.033 | 0.038 | 0.041 | 0.045 | 0.050 |  | 0.950 | 0.847 | 0.762 | 0.663 | 0.782 |
| 206                 | 8/2/2016                                                                      | 11:00:22   | 55.0       | dM           | 0.014  | 0.004 | 0.005 | 0.006 | 0.007 | 0.010 | 0.012 | 0.015 | 0.017 | 0.018 | 0.019 | 0.021 |  | 0.000 | 0.007 | 0.000 | 0.000 | 0.000 |
| 207                 | 8/2/2016                                                                      | 11:00:42   | 55.3       | dM           | 0.014  | 0.004 | 0.005 | 0.006 | 0.007 | 0.010 | 0.012 | 0.015 | 0.017 | 0.019 | 0.019 | 0.021 |  | 0.000 | 0.000 | 0.000 | 0.000 | 0.000 |
| 208                 | 8/2/2016                                                                      | 11:01:02   | 55.7       | dM           | 0.014  | 0.004 | 0.005 | 0.006 | 0.007 | 0.010 | 0.012 | 0.015 | 0.017 | 0.019 | 0.020 | 0.020 |  | 0.000 | 0.000 | 0.000 | 0.000 | 0.000 |
| 209                 | 8/2/2016                                                                      | 11:01:22   | 56.0       | dM           | 0.014  | 0.004 | 0.005 | 0.006 | 0.007 | 0.010 | 0.012 | 0.015 | 0.017 | 0.018 | 0.019 | 0.021 |  | 0.000 | 0.000 | 0.000 | 0.000 | 0.000 |
| 210                 | 8/2/2016                                                                      | 11:01:42   | 56.3       | dM           | 0.014  | 0.004 | 0.005 | 0.006 | 0.007 | 0.010 | 0.012 | 0.015 | 0.017 | 0.018 | 0.019 | 0.020 |  | 0.000 | 0.000 | 0.000 | 0.000 | 0.000 |
| 211                 | 8/2/2016                                                                      | 11:02:02   | 56.7       | dM           | 0.014  | 0.004 | 0.005 | 0.006 | 0.007 | 0.009 | 0.012 | 0.015 | 0.017 | 0.018 | 0.019 | 0.020 |  | 0.000 | 0.000 | 0.000 | 0.000 | 0.000 |
| 212                 | 8/2/2016                                                                      | 11:02:22   | 57.0       | dM           | 0.014  | 0.004 | 0.005 | 0.006 | 0.008 | 0.010 | 0.012 | 0.015 | 0.017 | 0.019 | 0.019 | 0.021 |  | 0.000 | 0.000 | 0.000 | 0.000 | 0.000 |
| 213                 | 8/2/2016                                                                      | 11:02:42   | 57.3       | dM           | 0.014  | 0.004 | 0.005 | 0.006 | 0.007 | 0.010 | 0.012 | 0.015 | 0.017 | 0.018 | 0.019 | 0.020 |  | 0.000 | 0.000 | 0.000 | 0.000 | 0.000 |
| 214                 | 8/2/2016                                                                      | 11:03:02   | 57.7       | dM           | 0.014  | 0.004 | 0.005 | 0.006 | 0.008 | 0.010 | 0.012 | 0.015 | 0.017 | 0.018 | 0.019 | 0.021 |  | 0.000 | 0.000 | 0.000 | 0.000 | 0.000 |
| 215                 | 8/2/2016                                                                      | 11:03:22   | 58.0       | dM           | 0.012  | 0.004 | 0.004 | 0.005 | 0.007 | 0.009 | 0.011 | 0.014 | 0.016 | 0.016 | 0.018 | 0.018 |  | 0.000 | 0.000 | 0.000 | 0.000 | 0.000 |
| 216                 | 8/2/2016                                                                      | 11:03:42   | 58.3       | dM           | 0.012  | 0.004 | 0.004 | 0.005 | 0.006 | 0.008 | 0.011 | 0.013 | 0.015 | 0.016 | 0.017 | 0.018 |  | 0.000 | 0.000 | 0.000 | 0.000 | 0.000 |
| 217                 | 8/2/2016                                                                      | 11:04:02   | 58.7       | dM           | 0.007  | 0.002 | 0.003 | 0.003 | 0.004 | 0.005 | 0.007 | 0.008 | 0.009 | 0.010 | 0.011 | 0.011 |  | 0.000 | 0.000 | 0.000 | 0.000 | 0.000 |
| 218                 | 8/2/2016                                                                      | 11:04:22   | 59.0       | dM           | 0.006  | 0.002 | 0.002 | 0.003 | 0.003 | 0.005 | 0.006 | 0.007 | 0.008 | 0.009 | 0.009 | 0.010 |  | 0.000 | 0.000 | 0.000 | 0.000 | 0.000 |
| 219                 | 8/2/2016                                                                      | 11:04:42   | 59.3       | dM           | 0.007  | 0.002 | 0.002 | 0.003 | 0.004 | 0.005 | 0.006 | 0.007 | 0.008 | 0.009 | 0.009 | 0.010 |  | 0.000 | 0.000 | 0.000 | 0.000 | 0.000 |
| 220                 | 8/2/2016                                                                      | 11:05:02   | 59.7       | dM           | 0.006  | 0.002 | 0.002 | 0.003 | 0.003 | 0.004 | 0.005 | 0.007 | 0.008 | 0.008 | 0.009 | 0.009 |  | 0.000 | 0.000 | 0.000 | 0.000 | 0.000 |
| 221                 | 8/2/2016                                                                      | 11:05:22   | 60.0       | dM           | 0.006  | 0.002 | 0.002 | 0.003 | 0.004 | 0.004 | 0.006 | 0.007 | 0.008 | 0.009 | 0.009 | 0.010 |  | 0.000 | 0.000 | 0.000 | 0.000 | 0.000 |

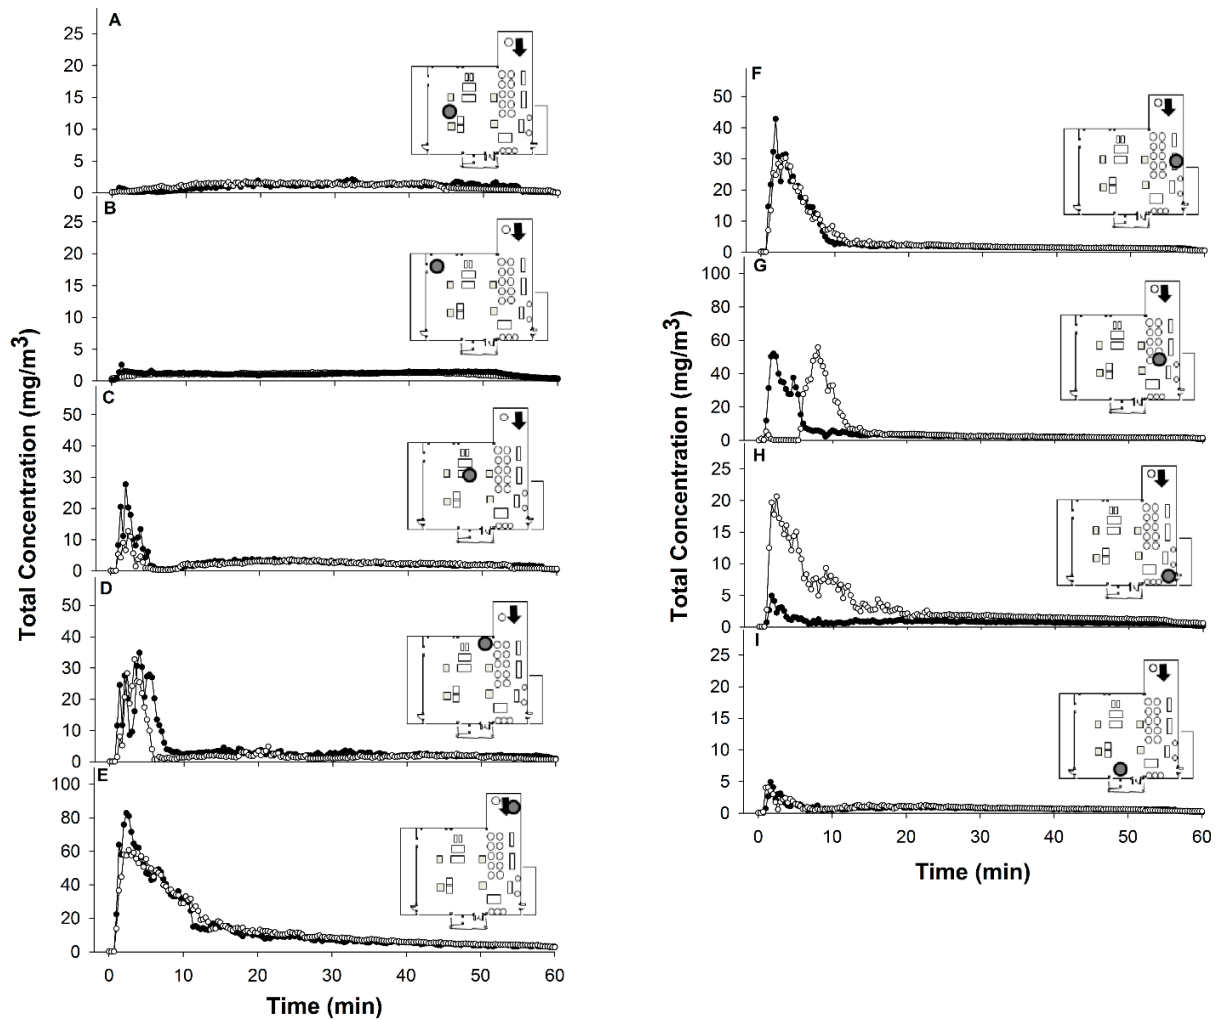

**Figure S4a.** Real time mass concentrations ( $\text{mg}/\text{m}^3$ ) of **Turbocide** aerosol particles detected by Aerodynamic Particle Sizers (APS) at nine locations after released from a high pressure cylinder in a flour mill. The aerosol was released at the **north-west** location (shown with a solid arrowhead) and detected by APS in each of the nine locations (shown with a large gray circle) in each inserted floor plan (A-I). In each graph, the two lines represent the mass concentrations obtained for 20-s intervals over a 60 min-exposure to the aerosol in trial 1 (shown with solid circles) and trial 2 (shown with open circles)

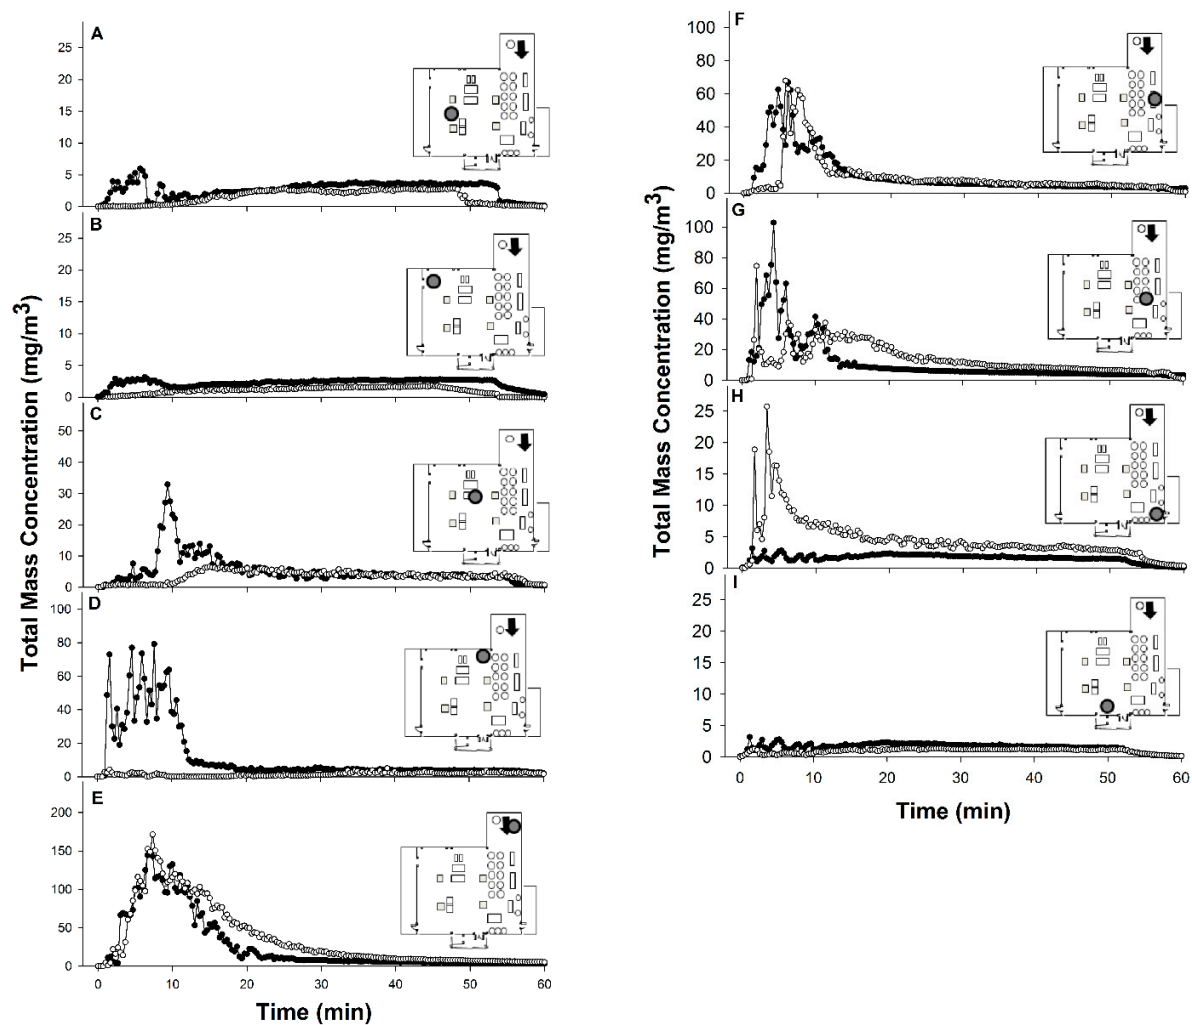

**Figure S4b.** Real time mass concentrations ( $\text{mg}/\text{m}^3$ ) of **Pyroclide** aerosol particles detected by Aerodynamic Particle Sizers (APS) at nine locations after released from a portable hand-held fogger in a flour mill. The aerosol was released at the **north-west** location (shown with a solid arrowhead) and detected by APS in each of the nine locations (shown with a large gray circle) in each inserted floor plan (A-I). In each graph, the two lines represent the mass concentrations obtained for 20-s intervals over a 60 min-exposure to the aerosol in trial 1 (shown with solid circles) and trial 2 (shown with open circles).

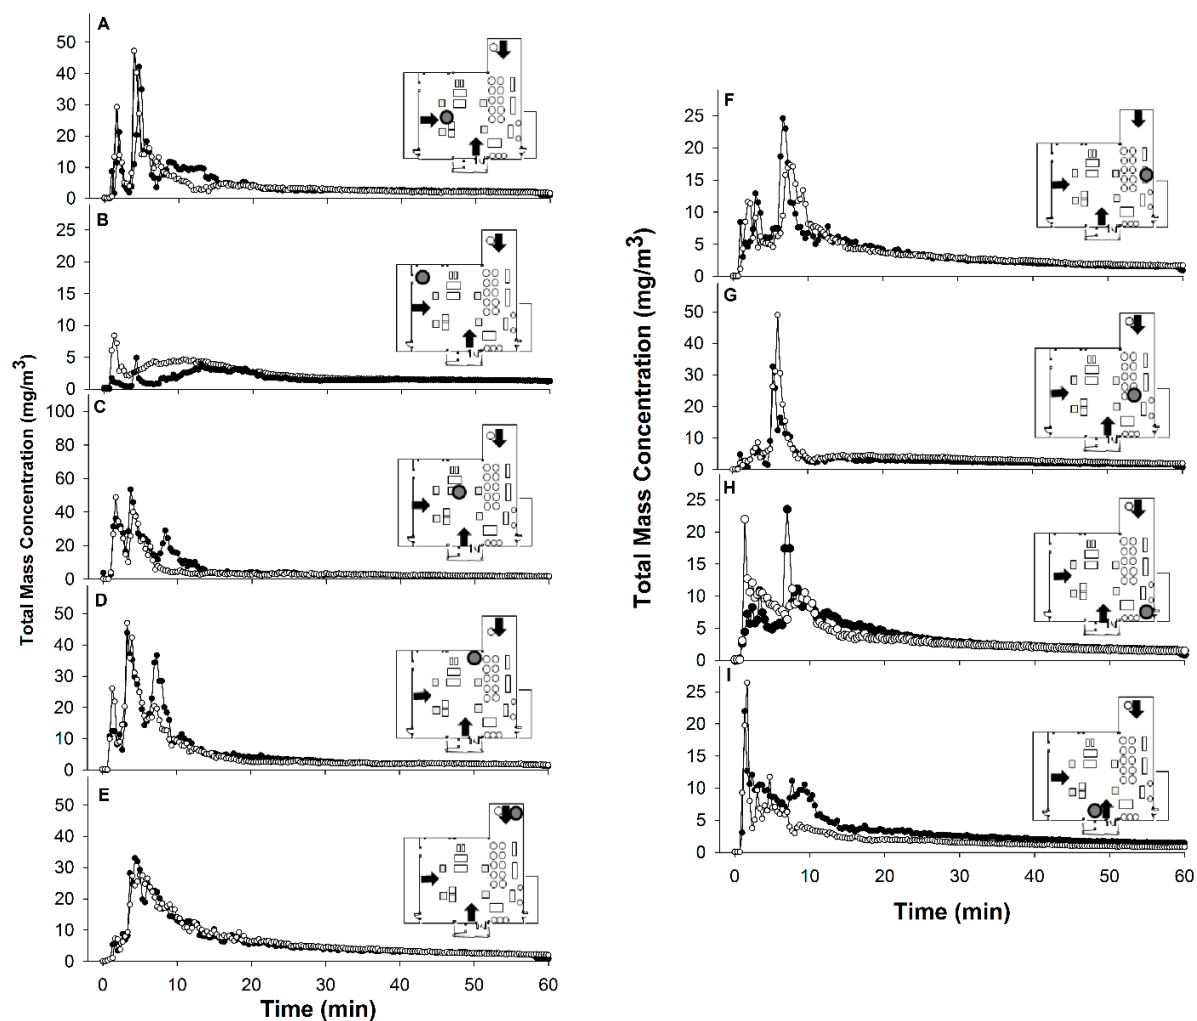

**Figure S4c.** Real time mass concentrations ( $\text{mg/m}^3$ ) of **Turbocide** aerosol particles detected by Aerodynamic Particle Sizers (APS) at nine locations after released from a high pressure cylinder in a flour mill. The aerosol was released at **multiple** locations (shown with a solid arrowhead) and detected by APS in each of the nine locations (shown with a large gray circle) in each inserted floor plan (A-I). In each graph, the two lines represent the mass concentrations obtained for 20-s intervals over a 60 min-exposure to the aerosol in trial 1 (shown with solid circles) and trial 2 (shown with open circles).

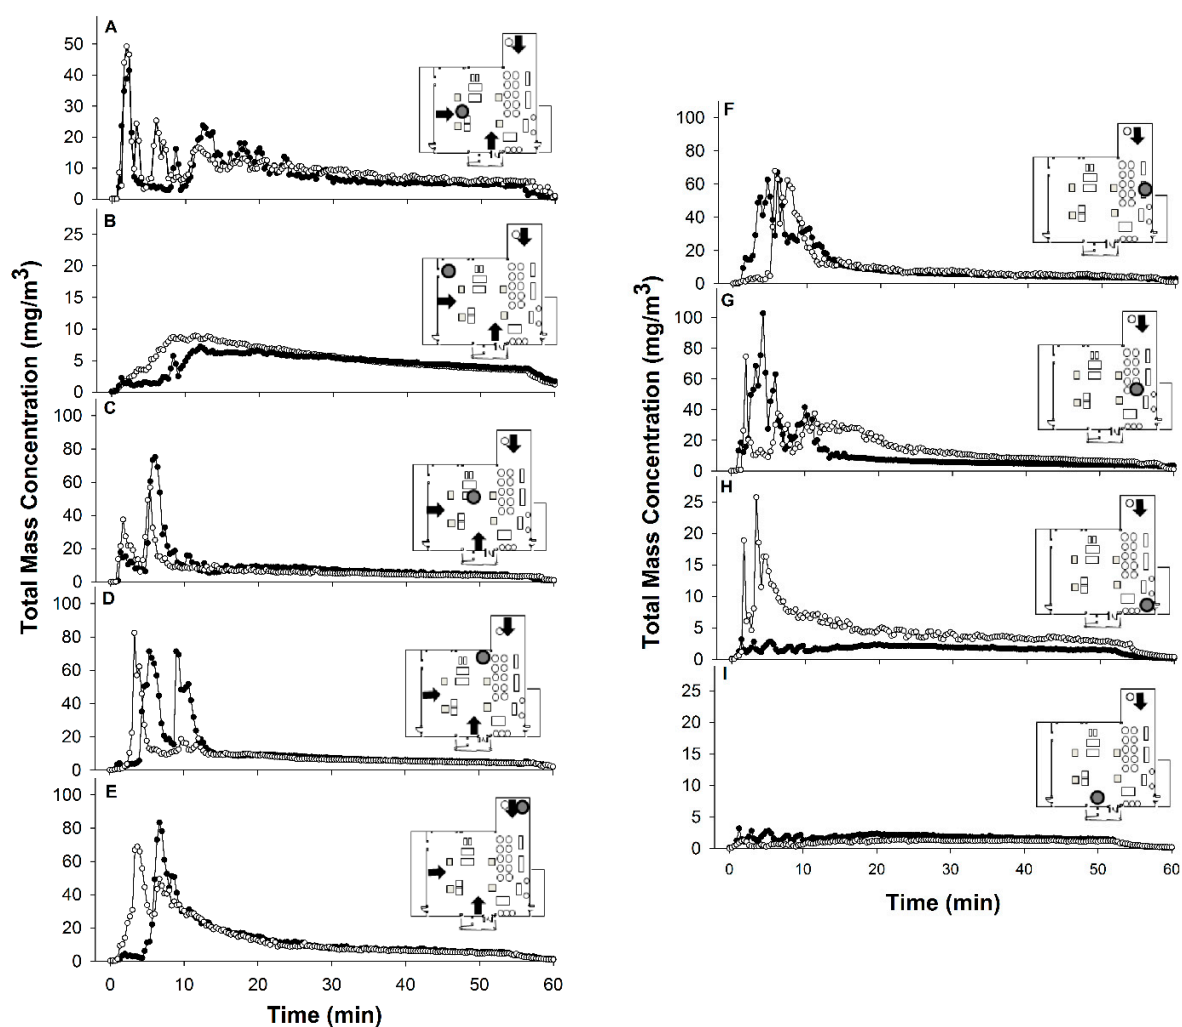

**Figure S4d.** Real time mass concentrations ( $\text{mg}/\text{m}^3$ ) of **Pyrocide** aerosol particles detected by Aerodynamic Particle Sizers (APS) at nine locations after released from a hand-held portable fogger in a flour mill. The aerosol was released at **multiple** locations (shown with a solid arrowhead) and detected by APS in each of the nine locations (shown with a large gray circle) in each inserted floor plan (A-I). In each graph, the two lines represent the mass concentrations obtained for 20-s intervals over a 60 min-exposure to the aerosol in trial 1 (shown with solid circles) and trial 2 (shown with open circles).



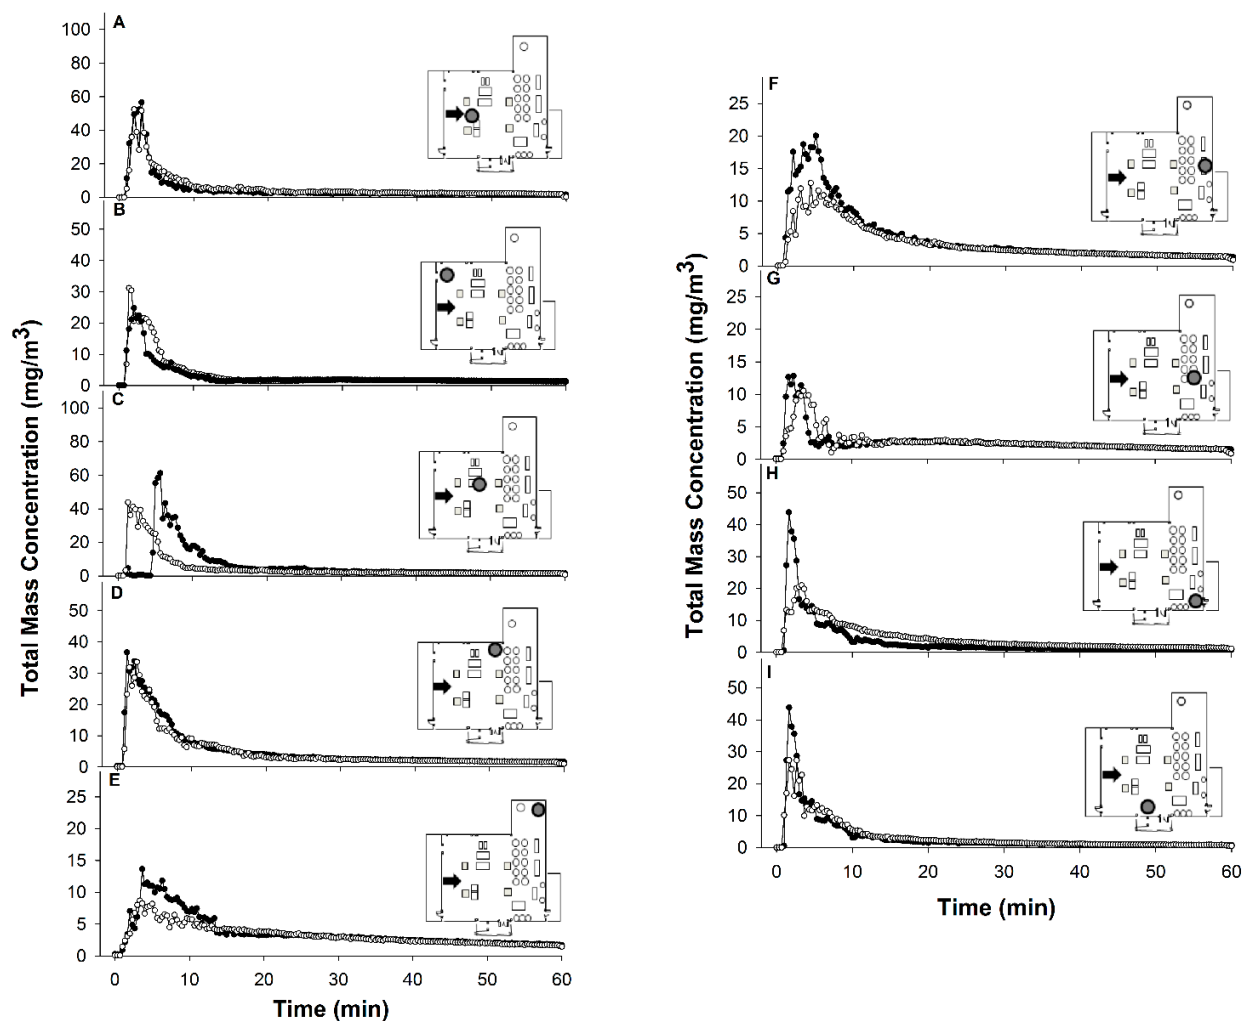

**Figure S4e.** Real time mass concentrations ( $\text{mg}/\text{m}^3$ ) of **Turbocide** aerosol particles detected by Aerodynamic Particle Sizers (APS) at nine locations after released from a high pressure cylinder in a flour mill. The aerosol was released at **south** location (shown with a solid arrowhead) and detected by APS in each of the nine locations (shown with a large gray circle) in each inserted floor plan (A-I). In each graph, the two lines represent the mass concentrations obtained for 20-s intervals over a 60 min-exposure to the aerosol in trial 1 (shown with solid circles) and trial 2 (shown with open circles).

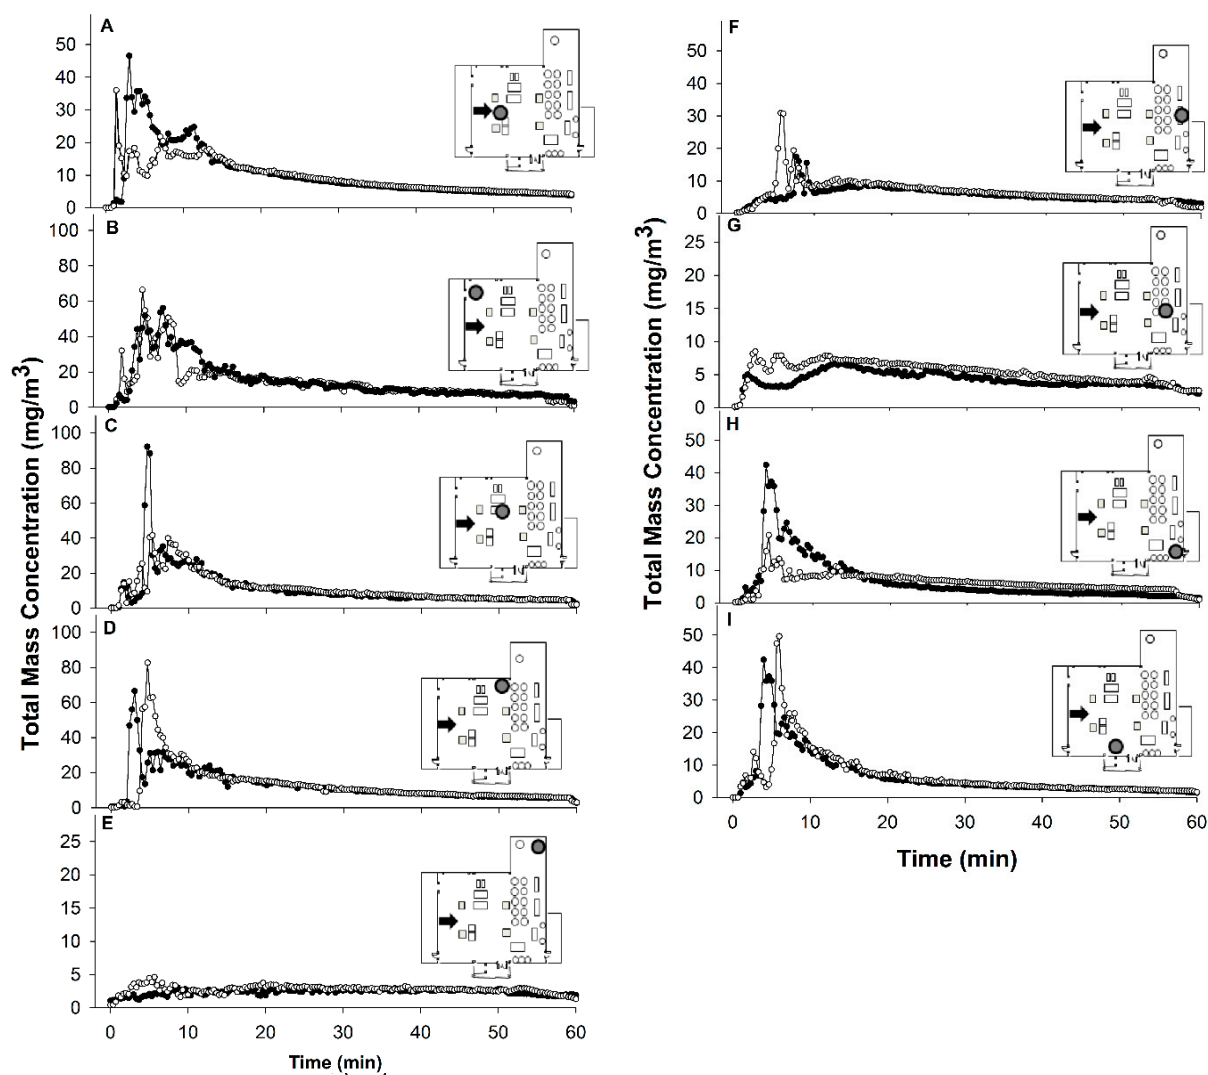

**Figure S4f.** Real time mass concentrations ( $\text{mg}/\text{m}^3$ ) of **Pyrocide** aerosol particles detected by Aerodynamic Particle Sizers (APS) at nine locations after released from a hand-held portable fogger in a flour mill. The aerosol was released at **south** location (shown with a solid arrowhead) and detected by APS in each of the nine locations (shown with a large gray circle) in each inserted floor plan (A-I). In each graph, the two lines represent the mass concentrations obtained for 20-s intervals over a 60 min-exposure to the aerosol in trial 1 (shown with solid circles) and trial 2 (shown with open circles).



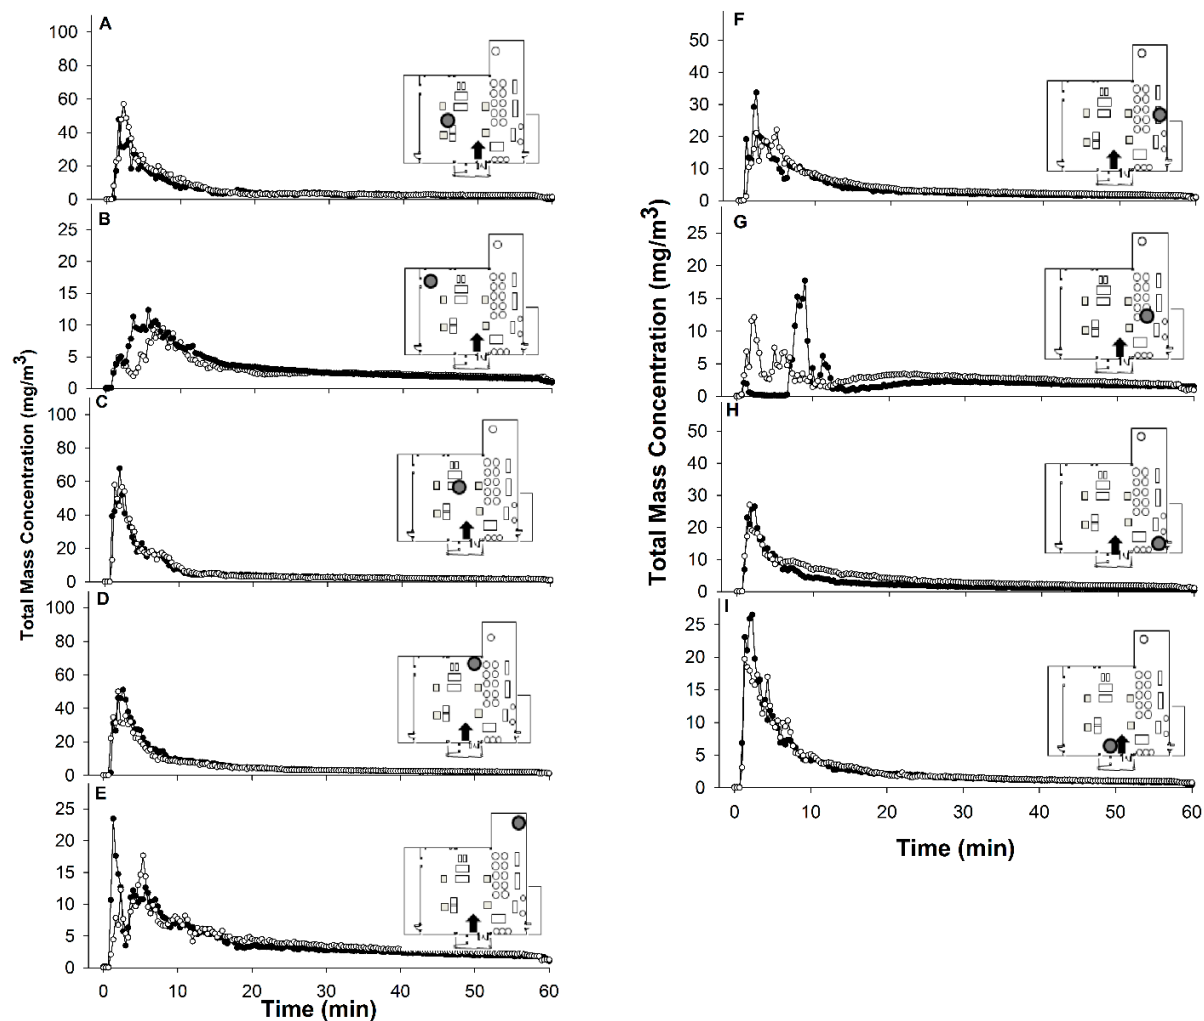

**Figure S4g.** Real time mass concentrations ( $\text{mg}/\text{m}^3$ ) of **Turbocide** aerosol particles detected by Aerodynamic Particle Sizers (APS) at nine locations after released from a high pressure cylinder in a flour mill. The aerosol was released at **east** location (shown with a solid arrowhead) and detected by APS in each of the nine locations (shown with a large gray circle) in each inserted floor plan (A-I). In each graph, the two lines represent the mass concentrations obtained for 20-s intervals over a 60 min-exposure to the aerosol in trial 1 (shown with solid circles) and trial 2 (shown with open circles).

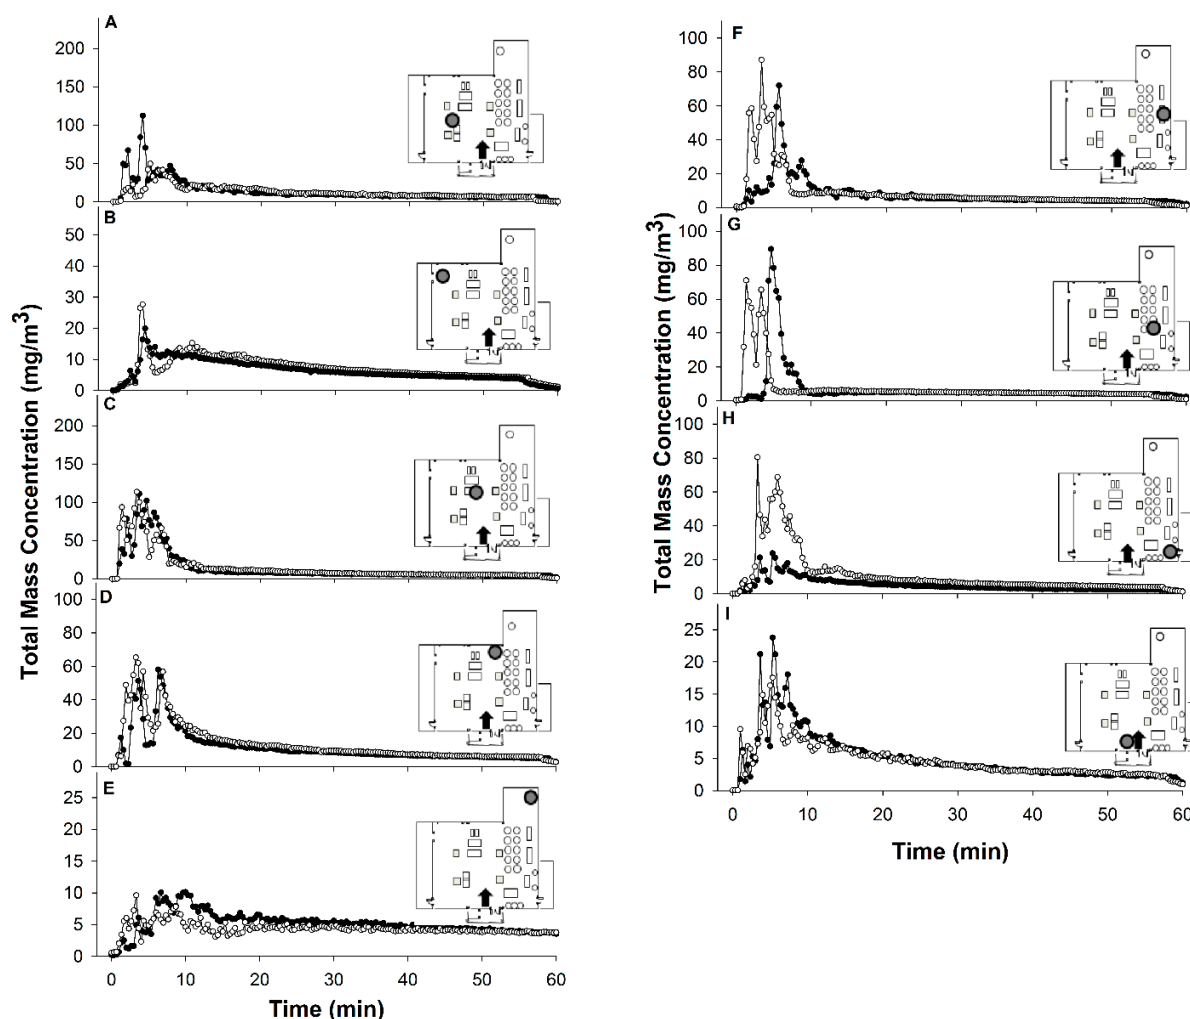

**Figure S4h.** Graphs showing real time mass concentrations of aerosol particles (mg/m<sup>3</sup>) obtained from nine Aerodynamic Particle Sizers (APS) at different locations in a flour mill exposed to **Pyrocide** aerosol released at **east** location (A-I). Each graph per APS unit with two lines represents mass concentrations obtained for 20 s intervals over a 60 minute-exposure to aerosol in trial 1 (black symbols) and trial 2 (white symbols). The inset in each graph is the floor plan of mill showing the location of APS unit (gray circle), and the location of Pyrocide aerosol released at east of the mill (black arrow) by using hand-held portable fogger.
